# Supplementary material for: Dysfunction of PLA2G6 and CYP2C44-associated network signals imminent carcinogenesis from chronic inflammation to hepatocellular carcinoma
Source: PubMed Central journal article supplement — J Mol Cell Biol. 2017 Jul 14;9(6):489–503. doi: 10.1093/jmcb/mjx021 (PMC5907842; doi:10.1093/jmcb/mjx021), 2017-07-14
Supplement: table_s1_summaryoflabel-freeproteomicdataset.pdf [file table_s1_summaryoflabel-freeproteomicdataset.pdf]

**Table S1. Summary of label-free proteomic dataset.**

| 5 individuals per time-point |                 | Time points |          |          |          |           |
|------------------------------|-----------------|-------------|----------|----------|----------|-----------|
|                              |                 | 2 months    | 3 months | 5 months | 7 months | 11 months |
| WHV/c-myc transgenic mice    | Spectral counts | 225229      | 222846   | 250935   | 234787   | 240670    |
|                              | Unique peptides | 19612       | 19209    | 17464    | 21615    | 21901     |
|                              | Protein groups  | 4525        | 4388     | 4104     | 4833     | 4842      |
| wt-C57BL/6 mice              | Spectral counts | 244744      | 216118   | 271674   | 252389   | 221693    |
|                              | Unique peptides | 19131       | 18894    | 17364    | 17674    | 20005     |
|                              | Protein groups  | 4183        | 4400     | 4152     | 4013     | 4567      |

A table displays numbers of spectral counts, unique peptides and protein groups identified by label-free quantified strategy for transgenic and control mice at each stage, individually. We identified a total of 42,689 distinct peptides among the 570 LC-MS/MS runs, corresponding to 2,381,085 spectra in an assembly of 8,713 protein groups with a peptide-level FDR of 0.4%. Quantitative data (with spectral counts in at least half mice) generated on 3,372 proteins, with a peptide-level FDR of 0.02% and a protein-level FDR of 0%. All data were renamed official gene symbols obtained from IPI mouse database (Version 3.82).
